# Supplementary material for: Cytomegalovirus Immunoglobulin G Levels and Subclinical Arterial Disease among People Living with HIV in Botswana: A Cross-Sectional Study
Source: MDPI journal article supplement (doi:10.3390/biomedicines12050935), 2024-04-23
Supplement: s1 [file s1]

## Supplementary Materials

**Table S1.** Associations between CMV and baseline demographic factors by study group.

|                    | All Study participants<br>(N=183) |         | HIV-negative<br>controls (N=79) |           | HIV-infected Groups (N=104)   |           |                                     |           |
|--------------------|-----------------------------------|---------|---------------------------------|-----------|-------------------------------|-----------|-------------------------------------|-----------|
|                    |                                   |         |                                 |           | HIV-infected on<br>ART (N=68) |           | HIV-infected<br>ART naïve<br>(N=36) |           |
|                    | r* with<br>CMV                    | p-value | r* with<br>CMV                  | p-value   | r* with<br>CMV                | p-value   | r* with<br>CMV                      | p-value   |
| Age                | 0.05                              | 0.52    | 0.03                            | 0.79      | 0.17                          | 0.16      | -0.02                               | 0.93      |
| CD4 nadir          |                                   |         | N/A                             | N/A       | -0.21                         | 0.17      | N/A                                 | N/A       |
| CD4 current        |                                   |         | N/A                             | N/A       | -0.06                         | 0.62      | -0.04                               | 0.82      |
| ART duration       |                                   |         | N/A                             | N/A       | 0.16                          | 0.19      | N/A                                 | N/A       |
|                    |                                   |         |                                 |           |                               |           |                                     |           |
|                    |                                   |         | Mean<br>(SD)<br>CMV             | p-value** | Mean (SD<br>or 95% CI)<br>CMV | p-value** | Mean<br>(SD)<br>CMV                 | p-value** |
| Gender             |                                   |         |                                 |           |                               |           |                                     |           |
| Male               | 64.1 (71.1)                       | 0.81    | 54.7<br>(69.6)                  | 0.56      | 53.2 (48.1)                   | 0.34      | 115.2<br>(95.8)                     | 0.22      |
| Female             | 61.9 (58.1)                       |         | 46.8<br>(44.4)                  |           | 66.0 (60.1)                   |           | 80.8<br>(70.6)                      |           |
|                    |                                   |         |                                 |           |                               |           |                                     |           |
| ART switch         |                                   |         |                                 |           |                               |           |                                     |           |
| 0                  |                                   |         | N/A                             | N/A       | 55.1<br>(32.8,77.5)           | 0.37      | N/A                                 | N/A       |
| 1                  |                                   |         | N/A                             | N/A       | 55.6<br>(24.8,86.3)           |           | N/A                                 | N/A       |
| > 2                |                                   |         | N/A                             | N/A       | 79.1<br>(41.9,116.3)          |           | N/A                                 | N/A       |
|                    |                                   |         |                                 |           |                               |           |                                     |           |
| ART regimen        |                                   |         |                                 |           |                               |           |                                     |           |
| PI                 |                                   |         | N/A                             | N/A       | 78.9<br>(48.8,109.0)          | 0.11      | N/A                                 | N/A       |
| NNRTI              |                                   |         | N/A                             | N/A       | 54.2<br>(36.6,71.7)           |           | N/A                                 | N/A       |
|                    |                                   |         |                                 |           |                               |           |                                     |           |
| Waist-hip<br>ratio | 0.10                              | 0.20    | 0.09                            | 0.45      | 0.11                          | 0.39      | 0.003                               | 0.98      |

|                        |             |      |             |      |             |      |              |      |
|------------------------|-------------|------|-------------|------|-------------|------|--------------|------|
| Cigarette smoking      |             |      |             |      |             |      |              |      |
| No                     | 61.9 (63.5) | 0.56 | 49.4 (55.9) | 0.61 | 59.2 (55.0) | 0.78 | 91.6 (82.7)  | 0.48 |
| Yes                    | 69.8 (72.7) |      | 58.0 (73.3) |      | 65.9 (54.6) |      | 123.1 (87.4) |      |
|                        |             |      |             |      |             |      |              |      |
| Hypertension diagnosis |             |      |             |      |             |      |              |      |
| No                     | 63.9 (66.0) | 0.59 | 51.2 (59.3) | 0.98 | 59.7 (56.3) | 0.97 | 95.1 (82.6)  |      |
| Yes                    | 55.6 (54.3) |      | 50.7 (63.8) |      | 60.4 (45.9) |      | --           |      |
|                        |             |      |             |      |             |      |              |      |
| HBA1C                  | 0.02        | 0.83 | 0.03        | 0.83 | 0.10        | 0.40 | -0.23        | 0.22 |
| Non-HDL cholesterol    | 0.03        | 0.71 | 0.21        | 0.06 | 0.05        | 0.66 | -0.37        | 0.03 |
|                        |             |      |             |      |             |      |              |      |
